# Supplementary material for: Realizing high power factor and thermoelectric performance in band engineered AgSbTe2
Source: PubMed Central journal article supplement — Nat Commun. 2025 Jan 2;16:22. doi: 10.1038/s41467-024-55280-0 (PMC11696114; doi:10.1038/s41467-024-55280-0), 2025-01-02
Supplement: 41467_2024_55280_MOESM1_ESM.pdf [file 41467_2024_55280_MOESM1_ESM.pdf]

# Supplementary Materials

## Realizing High Power Factor and Thermoelectric Performance in Band Engineered AgSbTe<sub>2</sub>

Yu Zhang,<sup>1,2,§\*</sup> Congcong Xing,<sup>1,2,§</sup> Dongyang Wang,<sup>3</sup> Aziz Genç,<sup>4</sup> Seng Huat Lee,<sup>5,6</sup> Cheng Chang,<sup>7</sup> Zhi Li,<sup>8</sup> Luyao Zheng,<sup>2</sup> Khak Ho Lim,<sup>9</sup> Hangtian Zhu,<sup>2,10</sup> Rabeya Bosry Smriti,<sup>2,11</sup> Yu Liu,<sup>12</sup> Shaobo Cheng,<sup>3</sup> Min Hong,<sup>13</sup> Xiaolei Fan,<sup>1,14</sup> Zhiqiang Mao,<sup>5,6</sup> Li-Dong Zhao,<sup>7</sup> Andreu Cabot,<sup>15,16</sup> Tiejun Zhu,<sup>1,17\*</sup> Bed Poudel,<sup>2\*</sup>

\*Corresponding author

Email: yzhangpeter@163.com (Y.Z.); zhutj@zju.edu.cn (T.Z); bup346@psu.edu (B.P.);

<sup>1</sup>Institute of Wenzhou, Zhejiang University, Wenzhou 325006, China

<sup>2</sup>Department of Materials Science and Engineering, Pennsylvania State University, University Park, Pennsylvania 16802, United States

<sup>3</sup>Henan Key Laboratory of Diamond Optoelectronic Materials and Devices, Key Laboratory of Material Physics, Ministry of Education, School of Physics, Zhengzhou University, Zhengzhou 450052, China

<sup>4</sup>Cardiff Catalysis Institute, School of Chemistry, Cardiff University, Cardiff CF10 3AT, UK

<sup>5</sup>2D Crystal Consortium, Materials Research Institute, The Pennsylvania State University, University Park, Pennsylvania 16802, United States

<sup>6</sup>Department of Physics, The Pennsylvania State University, University Park, Pennsylvania 16802, United States

<sup>7</sup>School of Materials Science and Engineering, Beihang University, Beijing 100191, China

<sup>8</sup>Department of Materials Science and Engineering, Northwestern University, Evanston, Illinois 60208, United States

<sup>9</sup>Institute of Zhejiang University-Quzhou, Quzhou 324000, China

<sup>10</sup>Beijing National Laboratory for Condensed Matter Physics, Institute of Physics, Chinese Academy of Sciences, Beijing 100190, China

<sup>11</sup>Department of Mechanical Engineering, Pennsylvania State University, University Park, Pennsylvania 16802, United States

<sup>12</sup>Anhui Province Key Laboratory of Advanced Catalytic Materials and Reaction Engineering, School of Chemistry and Chemical Engineering, Hefei University of Technology, Hefei 230009, China

<sup>13</sup>*Centre for Future Materials, and School of Engineering, University of Southern Queensland, Springfield Central, Queensland 4300, Australia*

<sup>14</sup>*Department of Chemical Engineering, School of Engineering, The University of Manchester, Oxford Road, Manchester M13 9PL, United Kingdom*

<sup>15</sup>*Catalonia Institute for Energy Research-IREC, Sant Adrià de Besòs, Barcelona 08930, Catalonia, Spain*

<sup>16</sup>*ICREA, Pg. Lluís Companys, 08010 Barcelona, Catalonia, Spain*

<sup>17</sup>*State Key Laboratory of Silicon and Advanced Semiconductor Materials, and School of Materials Science and Engineering, Zhejiang University, Hangzhou 310058, China*

<sup>§</sup>*These authors contributed equally to this work.*

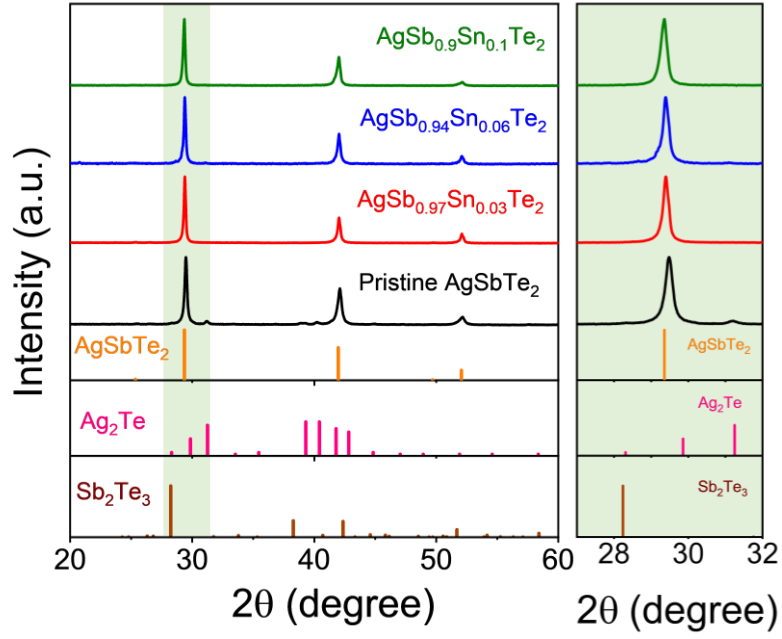

**Supplementary Figure 1. XRD pattern of  $\text{AgSb}_{1-x}\text{Sn}_x\text{Te}_2$  pellets.** XRD patterns of as-synthesized  $\text{AgSb}_{1-x}\text{Sn}_x\text{Te}_2$  pellets and the magnification of the XRD pattern showing a clear  $\text{Ag}_2\text{Te}$  peak in the pristine  $\text{AgSbTe}_2$  sample.

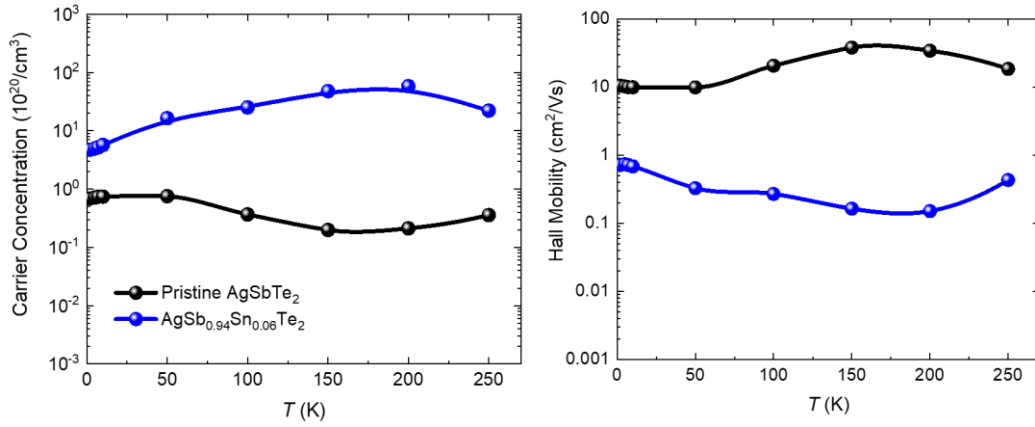

**Supplementary Figure 2. Low temperature hall transport properties.** Temperature-dependent carrier concentrations and mobility in pristine  $\text{AgSbTe}_2$  and  $\text{AgSb}_{0.94}\text{Sn}_{0.06}\text{Te}_2$ .

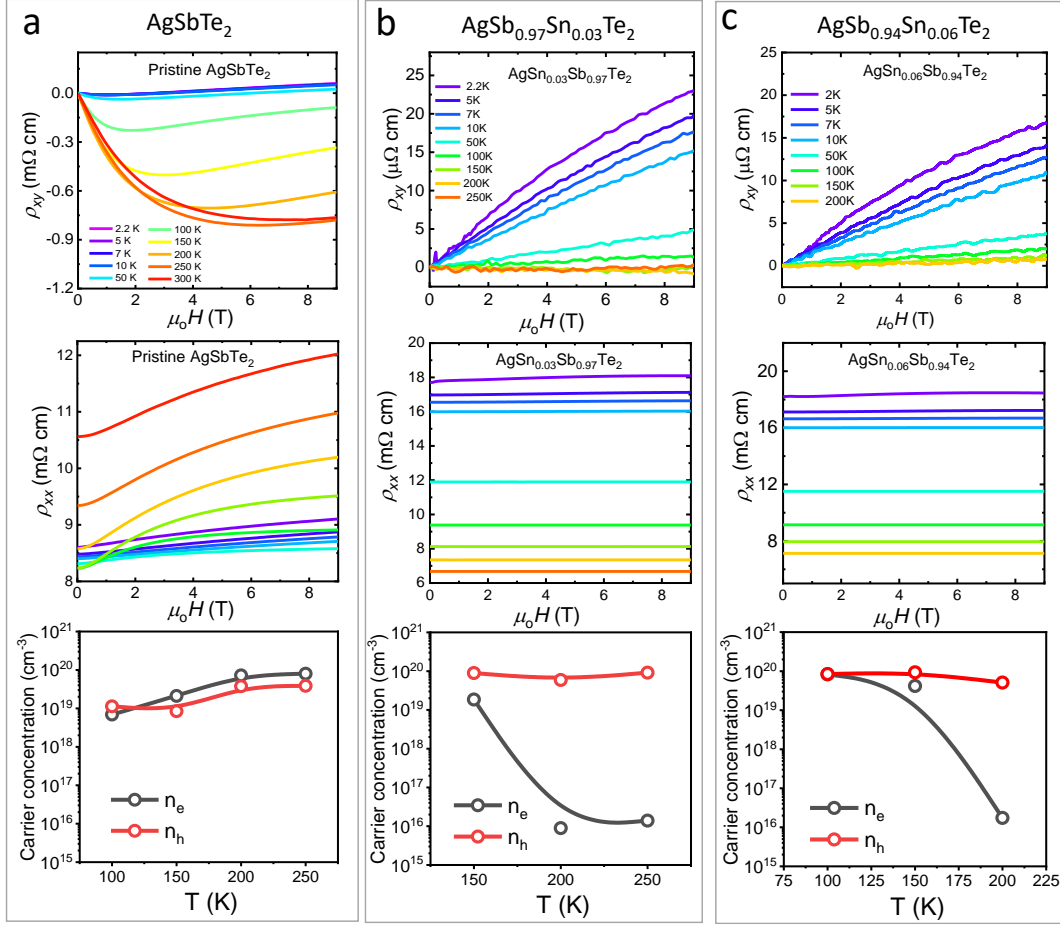

**Supplementary Figure 3. Carrier density simulated from two-carrier model.**

Representative field-dependent Hall resistivity ( $\rho_{xy}$ ), longitudinal resistivity ( $\rho_{xx}$ ) and calculated concentration of electrons ( $n_e$ ) and holes ( $n_h$ ) by two band model at different temperatures. (A) pristine AgSbTe<sub>2</sub>; (B) AgSb<sub>0.97</sub>Sn<sub>0.03</sub>Te<sub>2</sub> sample; (C) AgSb<sub>0.94</sub>Sn<sub>0.06</sub>Te<sub>2</sub> sample.

Given that AgSbTe<sub>2</sub> contains two types of carriers, the accurate concentrations (Figure S3) of electrons and holes requires two-carrier model to evaluate the impact of Sn doping on each carrier. The concentrations of both electrons and holes were estimated using two-carrier model and equation from previous works<sup>1,2</sup>:

$$\sigma_{xy} = \frac{\rho_{xy}}{\rho_{xx}^2 + \rho_{xy}^2} = \left[ \frac{-n_e \mu_e^2}{1 + (\mu_e B)^2} + \frac{n_h \mu_h^2}{1 + (\mu_h B)^2} \right] e \mathbf{B}$$

Where  $\rho_{xx}$ ,  $\rho_{xy}$  and  $\mathbf{B}$  are longitudinal resistivity, Hall resistivity and magnetic field strength measured from PPMS. In pristine AgSbTe<sub>2</sub>, the hole concentration ( $n_h$ ) presents consistently lower values than the electron concentration ( $n_e$ ) when  $T > 100$  K, aligning with previous reports of negative Hall coefficients in AgSbTe<sub>2</sub> at room temperature.<sup>3</sup> However, upon Sn doping, a

significant increase in hole concentration was observed, reaching  $9 \times 10^{19} \text{ cm}^{-3}$  in  $\text{AgSb}_{0.97}\text{Sn}_{0.03}\text{Te}_2$  sample, with all doped samples showing higher  $n_h$  than  $n_e$ .

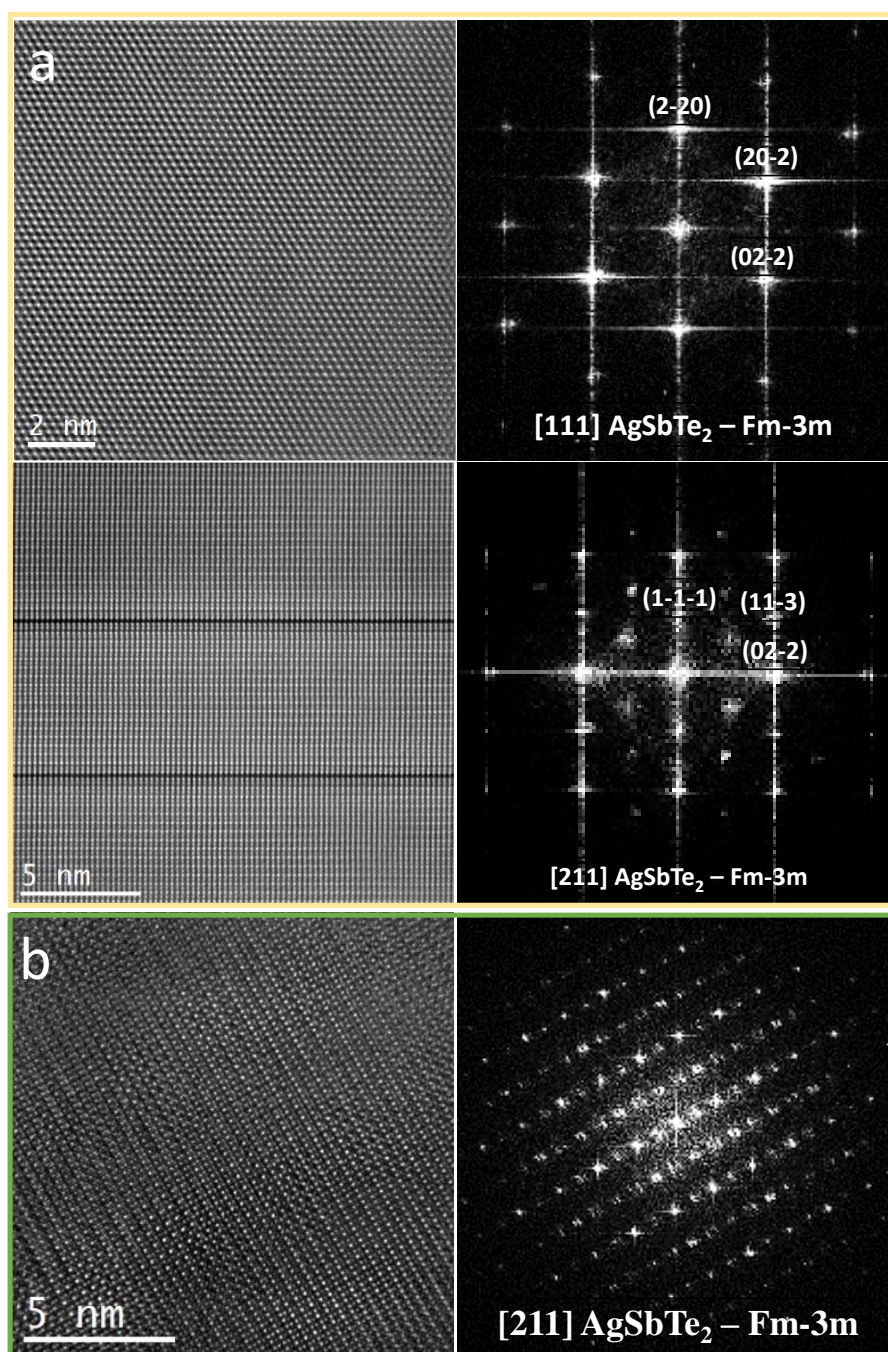

**Supplementary Figure 4. Microstructure characterization.** Atomic resolution HAADF-STEM micrograph and FFT pattern of (a) pristine  $\text{AgSbTe}_2$  and (b)  $\text{AgSb}_{0.94}\text{Sn}_{0.06}\text{Te}_2$  samples visualized along its  $[111]/[211]$  zone axis.

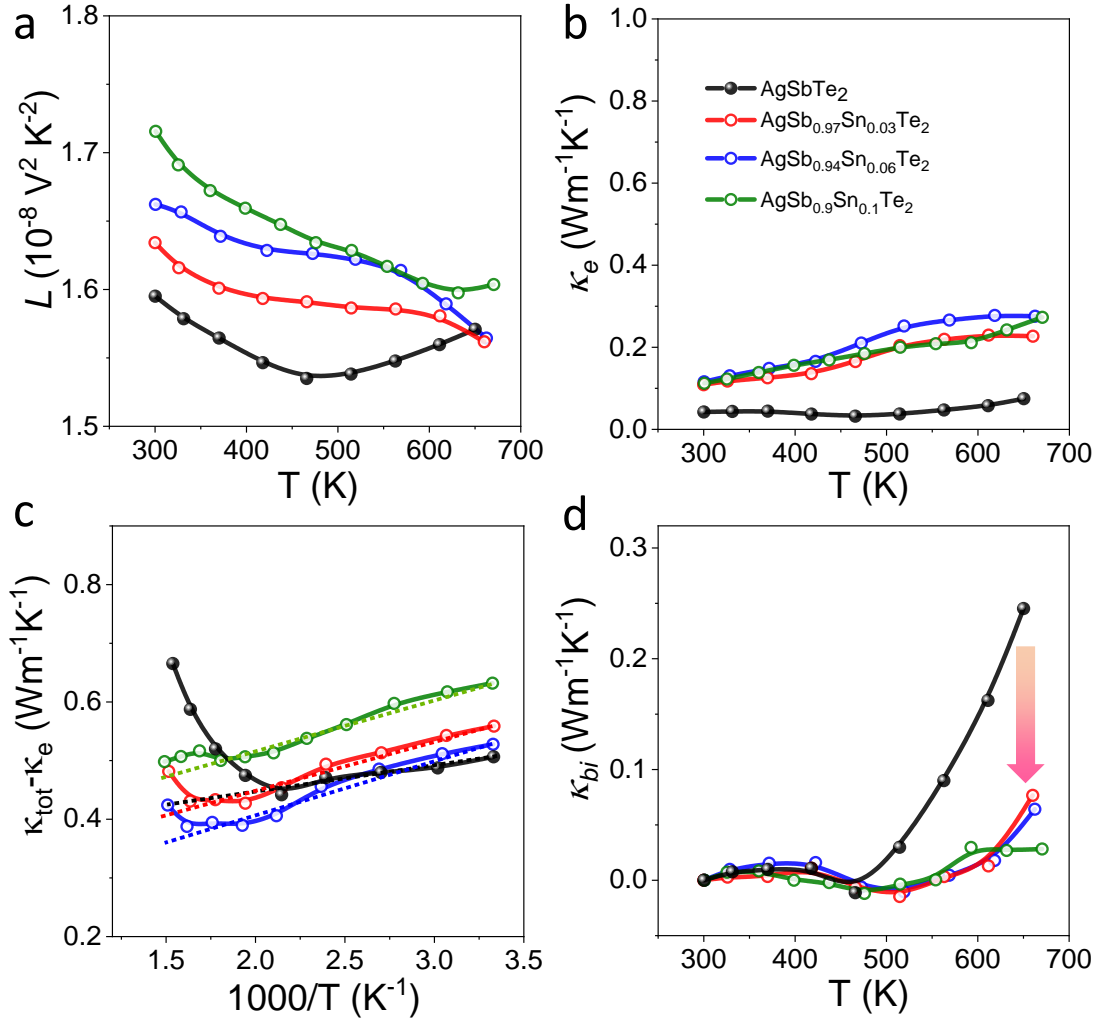

**Supplementary Figure 5. Lorenz number and thermal conductivity calculation.**

Temperature dependence of (a) Lorenz number,  $L$ ; (b) electronic thermal conductivity ( $\kappa_e$ ); (c) Subtraction of the electronic thermal conductivity from total thermal conductivity ( $\kappa_{\text{tot}} - \kappa_e$ ) and (d) bipolar thermal conductivity ( $\kappa_{bi}$ ) of polycrystalline  $\text{AgSb}_{1-x}\text{Sn}_x\text{Te}_2$  samples.

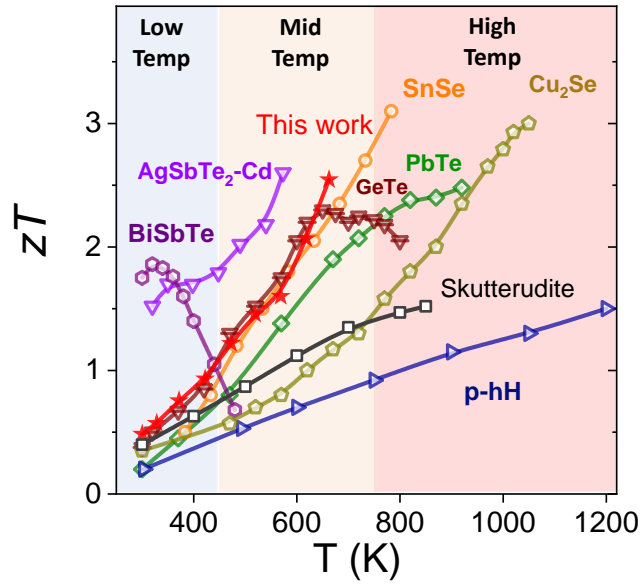

**Supplementary Figure 6. TE performance comparison.**  $zT$  comparison with state-of-art TE materials across low-, middle- and high-temperature regimes.<sup>4-11</sup>

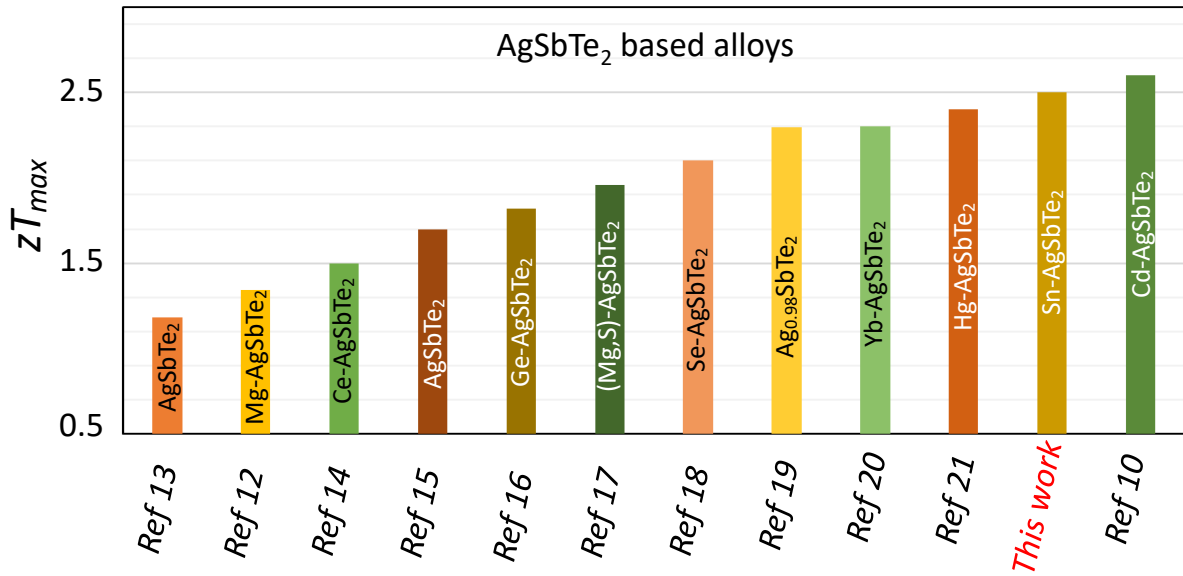

**Supplementary Figure 7. Maximum  $zT$  comparison.** Comparison of the maximum figure of merit,  $zT_{max}$ , of AgSb<sub>0.94</sub>Sn<sub>0.06</sub>Te<sub>2</sub> with other reported AgSbTe<sub>2</sub>-based materials.<sup>10,12-21</sup>

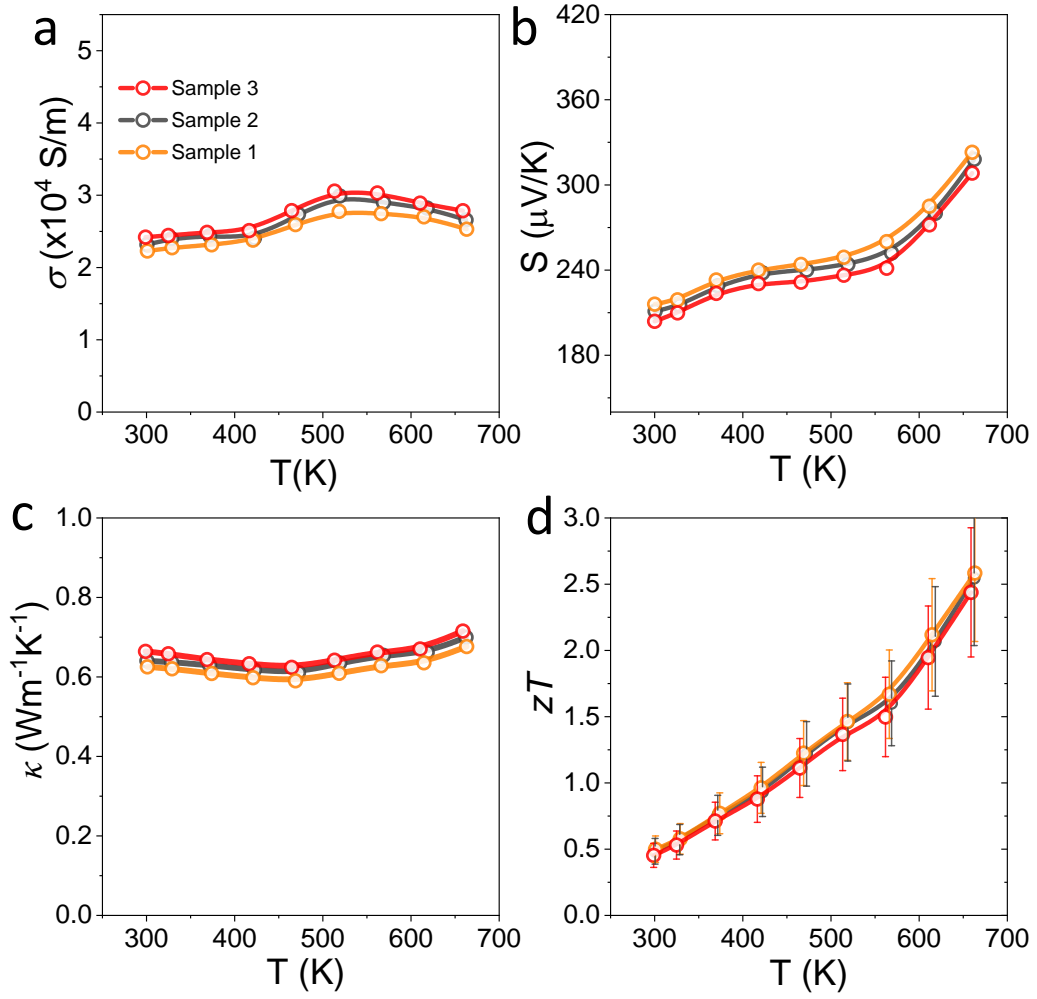

**Supplementary Figure 8. Reproducibility of TE properties on three  $\text{AgSb}_{0.94}\text{Sn}_{0.06}\text{Te}_2$  samples.** Temperature dependent TE performance of (a) electrical conductivity ( $\sigma$ ), (b) Seebeck coefficient ( $S$ ), (c) total thermal conductivity ( $\kappa$ ) and (d) TE figure of merit ( $zT$ ), the uncertainty of  $zT$  measurement is  $\sim 20\%$  as indicated by error bar.



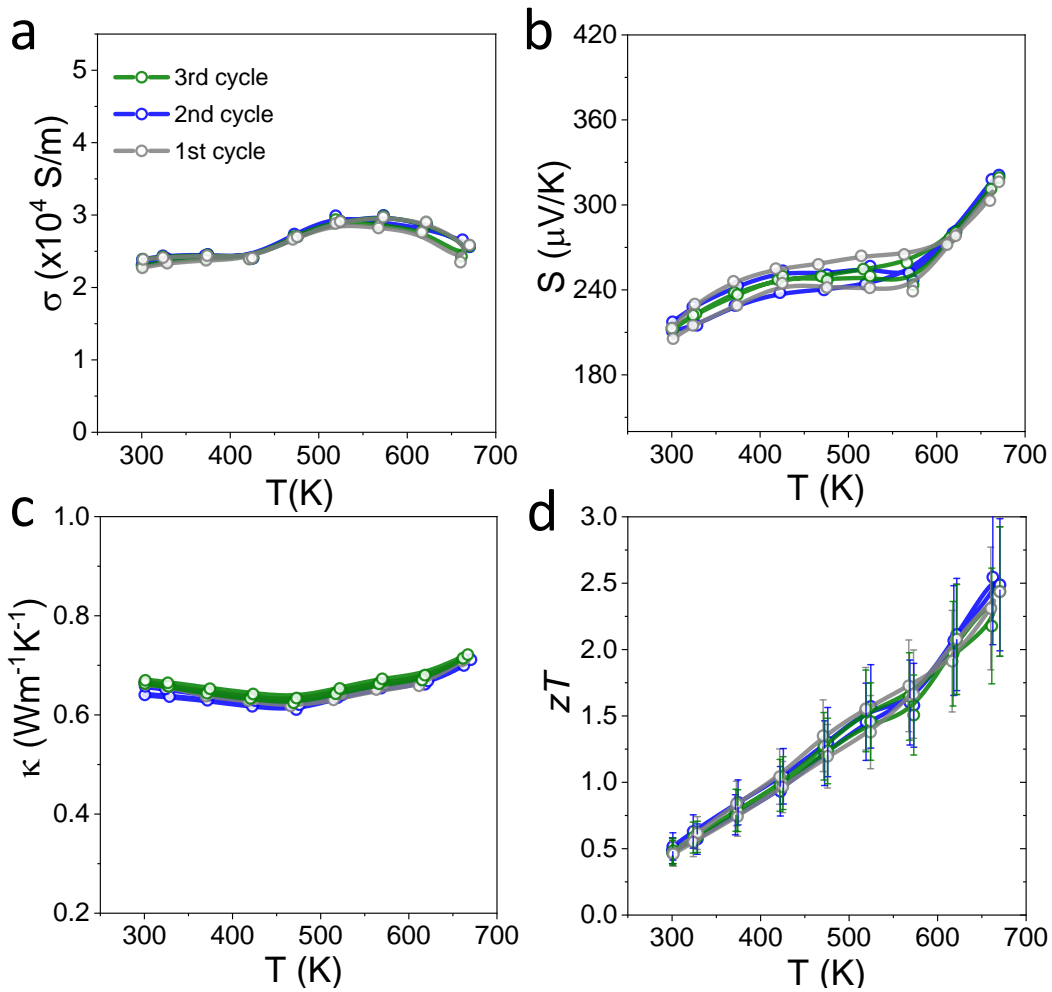

**Supplementary Figure 9. Reversibility of TE properties of  $\text{AgSb}_{0.94}\text{Sn}_{0.06}\text{Te}_2$  with three heating-cooling cycles.** Temperature-dependent TE performance: (a) electrical conductivity ( $\sigma$ ), (b) Seebeck coefficient ( $S$ ), (c) total thermal conductivity ( $\kappa$ ) and (d) TE figure of merit ( $zT$ ), the uncertainty of  $zT$  measurement is  $\sim 20\%$  as indicated by error bar.

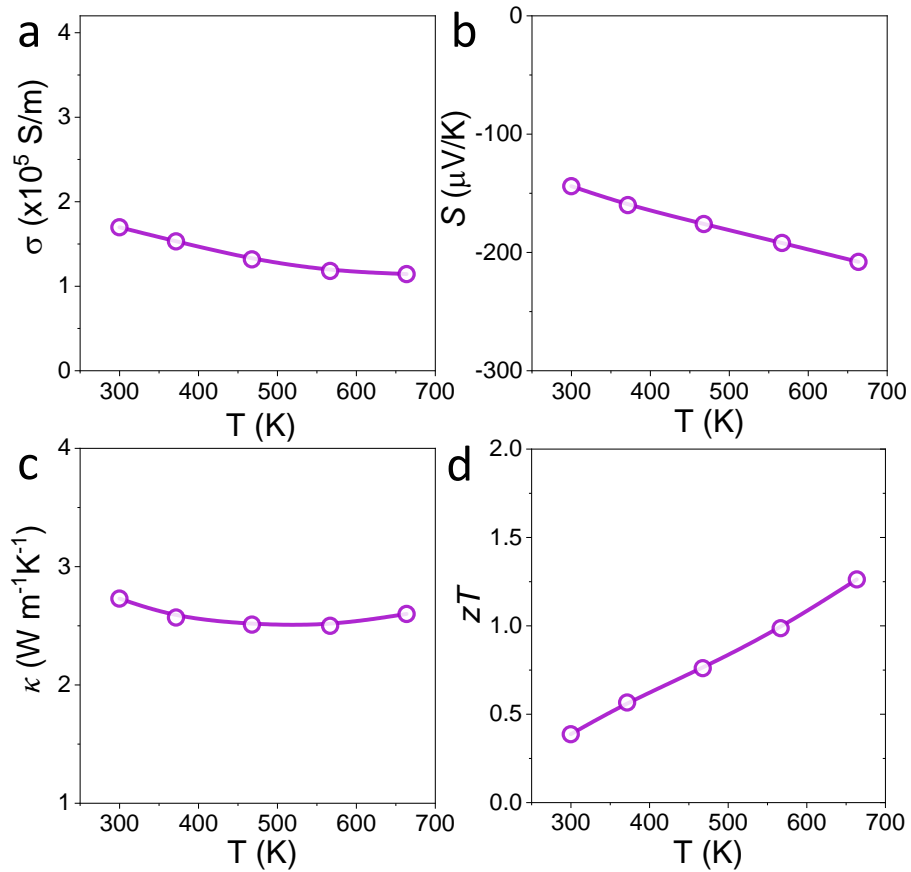

**Supplementary Figure 10. Thermoelectric properties of n-leg  $\text{Yb}_{0.25}\text{Co}_{3.75}\text{Fe}_{0.25}\text{Sb}_{12}$ .** TE properties of  $\text{Yb}_{0.25}\text{Co}_{3.75}\text{Fe}_{0.25}\text{Sb}_{12}$  skutterudite working as a n-leg. Temperature-dependent TE performance: (a) electrical conductivity ( $\sigma$ ), (b) Seebeck coefficient ( $S$ ), (c) total thermal conductivity ( $\kappa$ ) and (d) TE figure of merit ( $zT$ ).

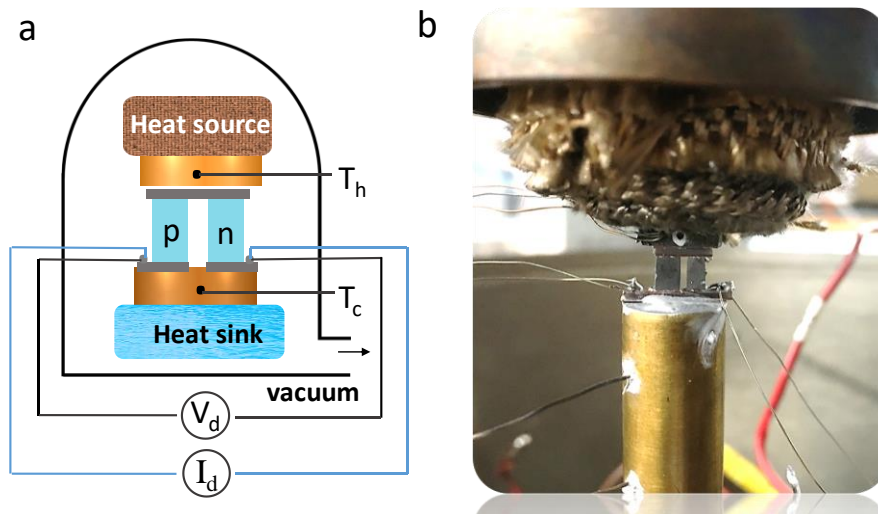

**Supplementary Figure 11. Power generation test.** (a) Schematic diagram of the unicouple measurement and (b) photograph of the fabricated device and the power generation measurement setup.

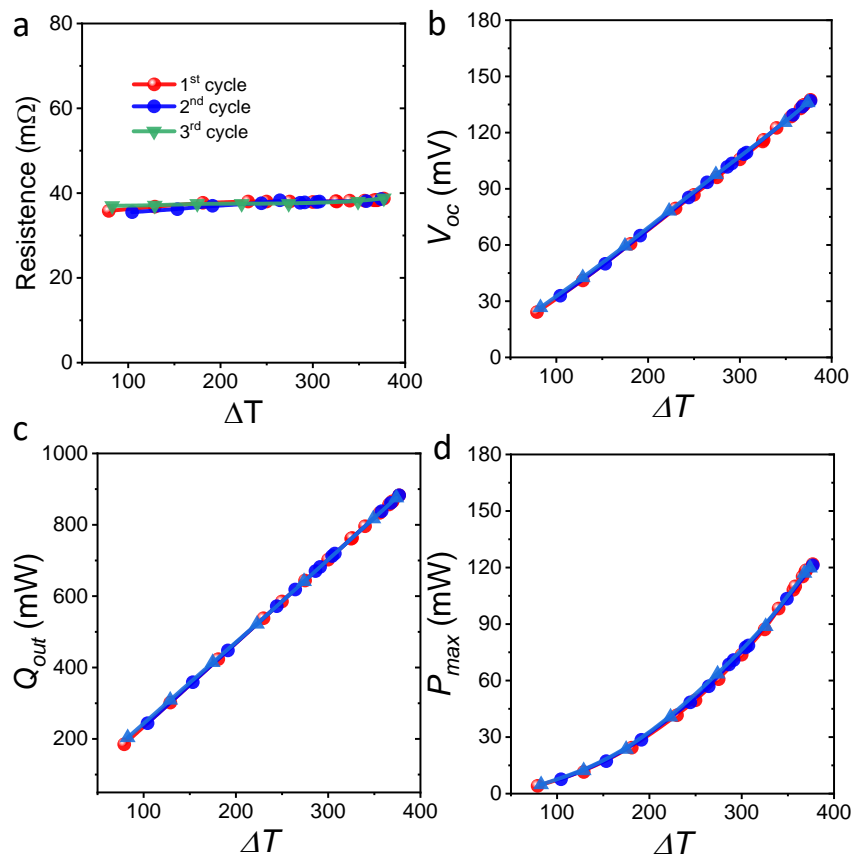

**Supplementary Figure 12. Cyclic performance of the unicouple device.** (a) Resistance; (b) Open circuit voltage ( $V_{oc}$ ); (c) heat flow ( $Q_{out}$ ); (d) maximum output power ( $P_{max}$ ) as a function of  $\Delta T$ .

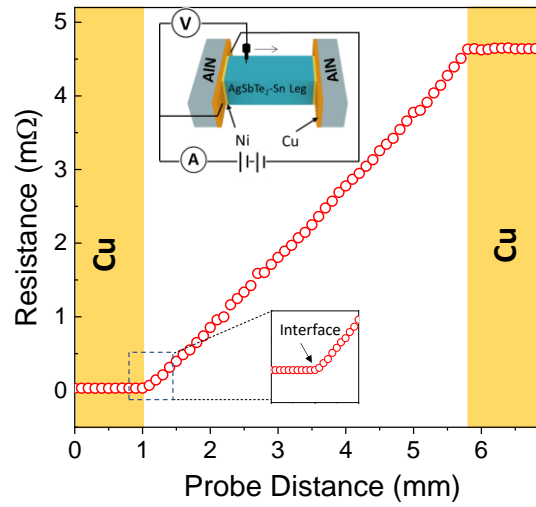

**Supplementary Figure 13. Contact resistance measurement.** The schematic diagram of home-made four-probe contact resistance measurement system and the contact resistance plots of  $\text{AgSb}_{0.94}\text{Sn}_{0.06}\text{Te}_2$  leg.

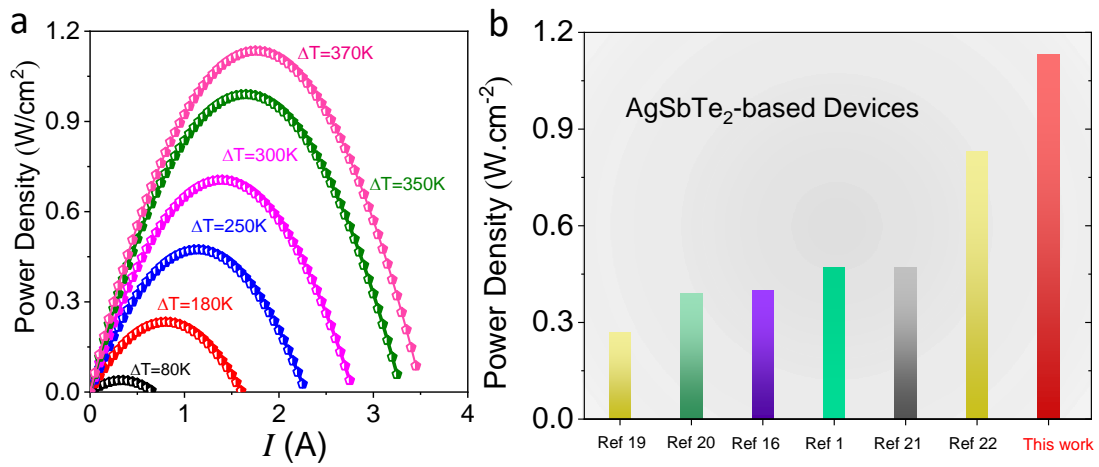

**Supplementary Figure 14. Power density of uncouple devices.** (a) Current-dependent power density of fabricated  $\text{AgSb}_{0.94}\text{Sn}_{0.06}\text{Te}_2$  uncouple module. (b) Power density comparison of state-of-art  $\text{AgSbTe}_2$  based devices<sup>1,16,19-22</sup>.

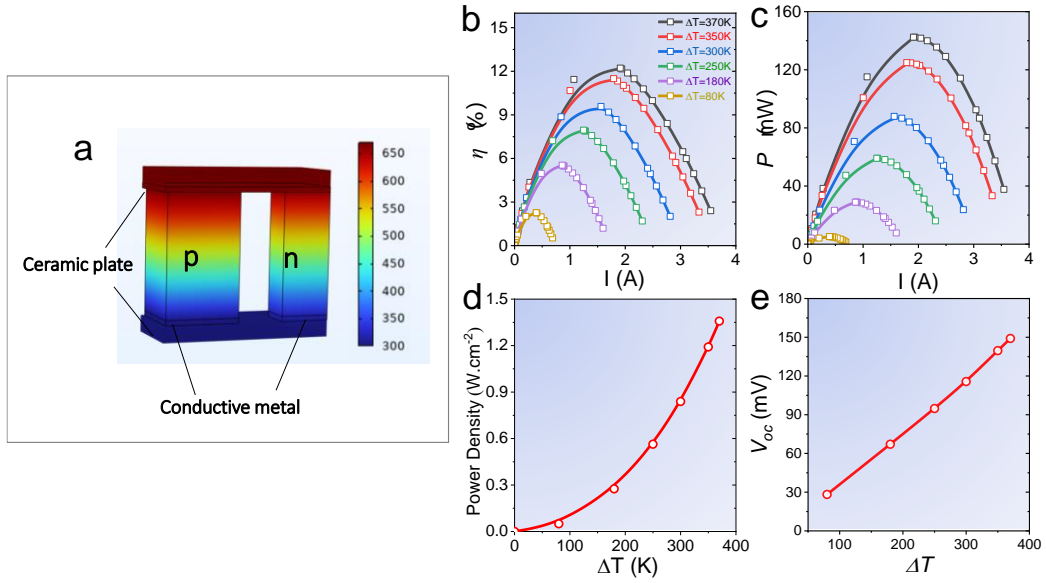

**Supplementary Figure 15. COMSOL Multiphysics Simulation.** (a) Schematic illustration of the simulated uncouple device made of  $\text{AgSb}_{0.94}\text{Sn}_{0.06}\text{Te}_2$  leg and  $\text{Yb}_{0.25}\text{Co}_{3.75}\text{Fe}_{0.25}\text{Sb}_{12}$  leg. (b) Simulated current-dependent conversion efficiency ( $\eta_{\max}$ ) and (c) output power ( $P_{\max}$ ) of the uncouple. (d) Simulated maximum power density and (e) open circuit voltage as a function of  $\Delta T$ .

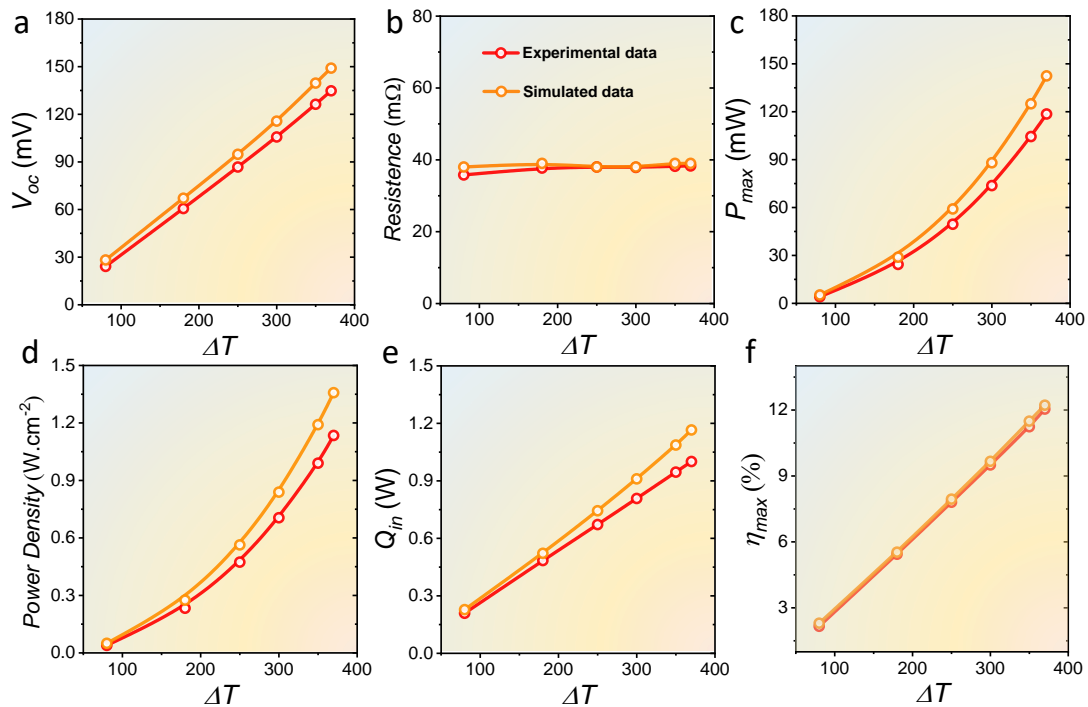

**Supplementary Figure 15-2. Data comparison.** Comparison of experimental data (red color) with the data from COMSOL Multiphysics simulation software (orange color) on the uncouple device made of  $\text{AgSb}_{0.94}\text{Sn}_{0.06}\text{Te}_2$  leg and  $\text{Yb}_{0.25}\text{Co}_{3.75}\text{Fe}_{0.25}\text{Sb}_{12}$  leg: (a) open-circuit voltage,  $V_{oc}$ ; (b) internal resistance; (c) power output,  $P_{\max}$ ; (d) power density; (e) heat flow,  $Q_{in}$  and (f) efficiency,  $\eta_{\max}$ .

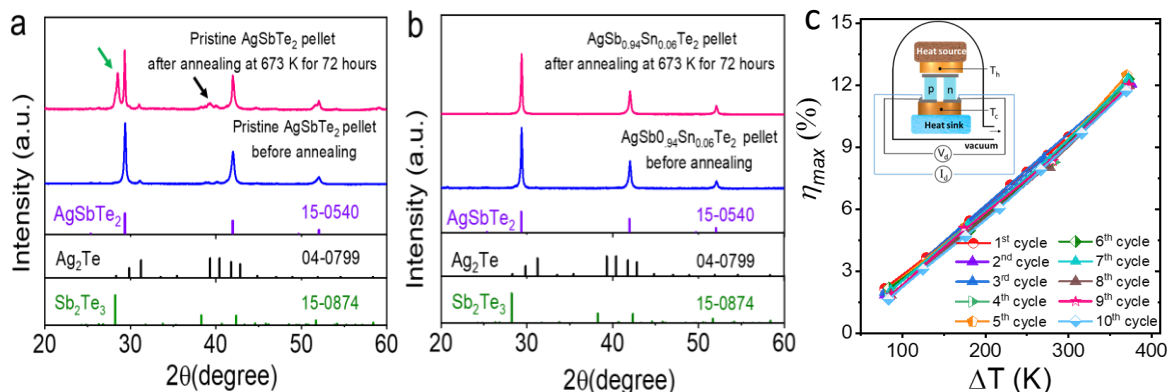

**Supplementary Figure 16. Stability Assessment.** XRD patterns of (a) pristine AgSbTe<sub>2</sub> and (b) AgSb<sub>0.94</sub>Sn<sub>0.06</sub>Te<sub>2</sub> samples before and after annealing in argon atmosphere at 673 K for 72 hours. (c) Cyclic test on the uncouple device after thermal cycling between 373 K and 673 K for ten cycles.

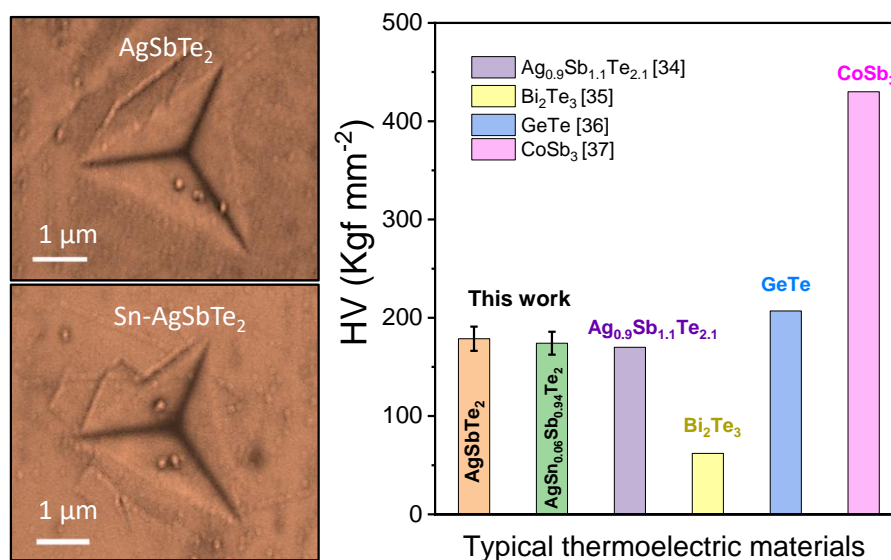

**Supplementary Figure 17. Mechanical Properties.** Comparisons on the Vickers hardness for AgSbTe<sub>2</sub> and AgSb<sub>0.94</sub>Sn<sub>0.06</sub>Te<sub>2</sub> with several typical TE materials. The Vickers hardness data are taken from references.<sup>23-26</sup>

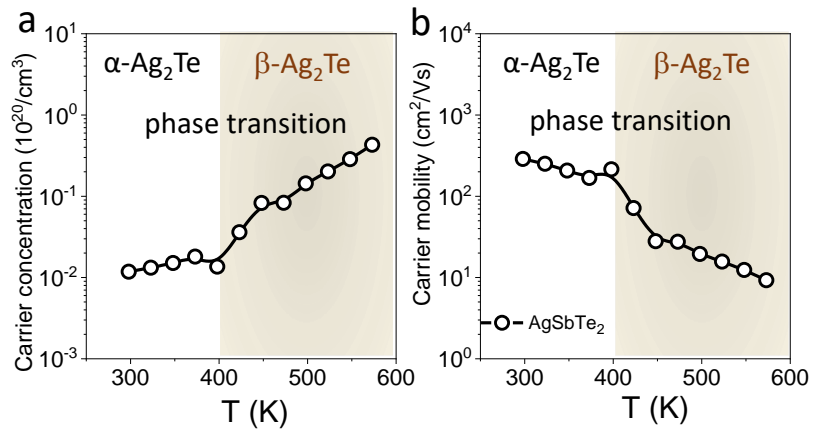

**Supplementary Figure 18. Carrier transport properties in pristine AgSbTe<sub>2</sub>.** (a) Hall carrier concentration and (b) mobility of at temperatures 300-600 K in undoped AgSbTe<sub>2</sub>.

**Supplementary Table 1.** Comparison of carrier density and mobility of AgSbTe<sub>2</sub> and AgSb<sub>1-x</sub>Sn<sub>x</sub>Te<sub>2</sub> samples at room temperature.

| Sample                                                  | Charger carrier density ( $n_H$ , cm <sup>-3</sup> ) | Charger carrier mobility ( $\mu_H$ , cm <sup>2</sup> /Vs) |
|---------------------------------------------------------|------------------------------------------------------|-----------------------------------------------------------|
| AgSbTe <sub>2</sub>                                     | $1.2 \times 10^{18}$                                 | 288.0                                                     |
| AgSb <sub>0.97</sub> Sn <sub>0.03</sub> Te <sub>2</sub> | $3.9 \times 10^{19}$                                 | 38.9                                                      |
| AgSb <sub>0.94</sub> Sn <sub>0.06</sub> Te <sub>2</sub> | $2.0 \times 10^{19}$                                 | 77.3                                                      |
| AgSb <sub>0.9</sub> Sn <sub>0.1</sub> Te <sub>2</sub>   | $3.5 \times 10^{19}$                                 | 31.0                                                      |

**Supplementary Table 2.** Density of AgSbTe<sub>2</sub> and AgSb<sub>1-x</sub>Sn<sub>x</sub>Te<sub>2</sub> samples

| Sample                                                  | Density (g/cm <sup>3</sup> ) | Relative density |
|---------------------------------------------------------|------------------------------|------------------|
| AgSbTe <sub>2</sub>                                     | 6.85                         | 96.1 %           |
| AgSb <sub>0.97</sub> Sn <sub>0.03</sub> Te <sub>2</sub> | 6.81                         | 95.5 %           |
| AgSb <sub>0.94</sub> Sn <sub>0.06</sub> Te <sub>2</sub> | 6.87                         | 96.3 %           |
| AgSb <sub>0.9</sub> Sn <sub>0.1</sub> Te <sub>2</sub>   | 6.89                         | 96.7 %           |



## References

- 1 Zhang, K. *et al.* Dual Alloying Enables High Thermoelectric Performance in AgSbTe<sub>2</sub> by Manipulating Carrier Transport Behavior. *Adv. Funct. Mater.* 2400679 (2024).
- 2 Pan, Y. *et al.* Ultrahigh transverse thermoelectric power factor in flexible Weyl semimetal WTe<sub>2</sub>. *Nat. Commun.* **13**, 3909 (2022).
- 3 Du, B., Li, H., Xu, J., Tang, X. & Uher, C. Enhanced figure-of-merit in Se-doped p-type AgSbTe<sub>2</sub> thermoelectric compound. *Chem. Mater.* **22**, 5521-5527 (2010).
- 4 Kim, S. I. *et al.* Dense dislocation arrays embedded in grain boundaries for high-performance bulk thermoelectrics. *Science* **348**, 109-114 (2015).
- 5 Zhou, C. *et al.* Polycrystalline SnSe with a thermoelectric figure of merit greater than the single crystal. *Nat. Mater.* **20**, 1378-1384 (2021).
- 6 Jiang, Y. *et al.* Evolution of defect structures leading to high ZT in GeTe-based thermoelectric materials. *Nat. Commun.* **13**, 6087 (2022).
- 7 Zong, P.-a. *et al.* Construction of a 3D-rGO network-wrapping architecture in a Yb<sub>y</sub>Co<sub>4</sub>Sb<sub>12</sub>/rGO composite for enhancing the thermoelectric performance. *J. Mater. Chem.* **3**, 8643-8649 (2015).
- 8 Tan, G. *et al.* Non-equilibrium processing leads to record high thermoelectric figure of merit in PbTe-SrTe. *Nat. Commun.* **7**, 12167 (2016).
- 9 Hu, H. *et al.* Highly stabilized and efficient thermoelectric copper selenide. *Nat. Mater.* **23**, 527-534 (2024).
- 10 Roychowdhury, S. *et al.* Enhanced atomic ordering leads to high thermoelectric performance in AgSbTe<sub>2</sub>. *Science* **371**, 722-727 (2021).
- 11 Ghosh, S. *et al.* High-entropy-driven half-Heusler alloys boost thermoelectric performance. *Joule* (2024).
- 12 Du, R. *et al.* Enhanced thermoelectric performance of Mg-doped AgSbTe<sub>2</sub> by inhibiting the formation of Ag<sub>2</sub>Te. *ACS Appl. Mater. Interfaces.* **15**, 9508-9516 (2023).
- 13 Cao, J. *et al.* Non-equilibrium strategy for enhancing thermoelectric properties and improving stability of AgSbTe<sub>2</sub>. *Nano Energy* **107**, 108118 (2023).
- 14 Lee, J. K. *et al.* Enhanced thermoelectric properties of AgSbTe<sub>2</sub> obtained by controlling heterophases with Ce doping. *Sci. Rep.* **7**, 4496 (2017).
- 15 Kim, J. H. *et al.* Enhancement of Phase Stability and Thermoelectric Performance of Meta-Stable AgSbTe<sub>2</sub> by Thermal Cycling Process. *Adv. Funct. Mater.* 2404886 (2024).
- 16 Chen, B. C., Wang, K. K. & Wu, H. J. Cation Modulation in AgSbTe<sub>2</sub> Realizes Carrier Optimization, Defect Engineering, and a 7% Single-Leg Thermoelectric Efficiency. *Small*, 2401723 (2024).
- 17 Ganesan, P. *et al.* Carrier optimization and reduced thermal conductivity leading to enhanced thermoelectric performance in (Mg, S) co-doped AgSbTe<sub>2</sub>. *Mater. Today Phys.* **42**, 101358 (2024).
- 18 Hong, M. *et al.* Achieving zT>2 in p-type AgSbTe<sub>2-x</sub>Se<sub>x</sub> alloys via exploring the extra light valence band and introducing dense stacking faults. *Adv. Energy Mater.* **8**, 1702333 (2018).
- 19 Pathak, R. *et al.* Vacancy controlled nanoscale cation ordering leads to high thermoelectric performance. *Energy Environ. Sci.* **16**, 3110-3118 (2023).
- 20 Taneja, V. *et al.* High Thermoelectric Performance in Phonon-Glass Electron-Crystal Like AgSbTe<sub>2</sub>. *Adv. Mater.* 2307058 (2024).
- 21 Bhui, A. *et al.* Hg Doping Induced Reduction in Structural Disorder Enhances the Thermoelectric Performance in AgSbTe<sub>2</sub>. *J. Am. Chem. Soc.* **145**, 25392-25400 (2023).
- 22 Zhang, Y. *et al.* Defect-engineering-stabilized AgSbTe<sub>2</sub> with high thermoelectric performance. *Adv. Mater.* **35**, 2208994 (2023).
- 23 Wu, Y. *et al.* High-performance and stable AgSbTe<sub>2</sub>-based thermoelectric materials for near room temperature applications. *J. Materiomics.* **8**, 1095-1103 (2022).
- 24 Perumal, S., Roychowdhury, S. & Biswas, K. Reduction of thermal conductivity through nanostructuring enhances the thermoelectric figure of merit in Ge<sub>1-x</sub>Bi<sub>x</sub>Te. *Inorg. Chem. Front.* **3**, 125-132 (2016).
- 25 Wang, D.-Z. *et al.* Simultaneously achieving high ZT and mechanical hardness in highly alloyed GeTe with symmetric nanodomains. *J. Chem. Eng.* **441**, 136131 (2022).
- 26 Dahal, T. *et al.* Thermoelectric and mechanical properties on misch metal filled p-type

skutterudites  $Mm_{0.9}Fe_{4-x}Co_xSb_{12}$ . *J. Appl. Phys.* **117** (2015).
