# Supplementary material for: Realizing high power factor and thermoelectric performance in band engineered AgSbTe2
Source: PubMed Central journal article supplement — Nat Commun. 2025 Jan 2;16:22. doi: 10.1038/s41467-024-55280-0 (PMC11696114; doi:10.1038/s41467-024-55280-0), 2025-01-02
Supplement: 41467_2024_55280_MOESM2_ESM.pdf [file 41467_2024_55280_MOESM2_ESM.pdf]

## Lasing Reporting Summary

Nature Research wishes to improve the reproducibility of the work that we publish. This form is intended for publication with all accepted papers reporting claims of lasing and provides structure for consistency and transparency in reporting. Some list items might not apply to an individual manuscript, but all fields must be completed for clarity.

For further information on Nature Research policies, including our [data availability policy](#), see [Authors & Referees](#).

### • Experimental design

#### Please check: are the following details reported in the manuscript?

##### 1. Threshold

Plots of device output power versus pump power over a wide range of values indicating a clear threshold

Yes  
 No

*Explain why this information is not reported/not relevant.*

##### 2. Linewidth narrowing

Plots of spectral power density for the emission at pump powers below, around, and above the lasing threshold, indicating a clear linewidth narrowing at threshold

Yes  
 No

*Explain why this information is not reported/not relevant.*

Resolution of the spectrometer used to make spectral measurements

Yes  
 No

*Explain why this information is not reported/not relevant.*

##### 3. Coherent emission

Measurements of the coherence and/or polarization of the emission

Yes  
 No

*Explain why this information is not reported/not relevant.*

##### 4. Beam spatial profile

Image and/or measurement of the spatial shape and profile of the emission, showing a well-defined beam above threshold

Yes  
 No

*Explain why this information is not reported/not relevant.*

##### 5. Operating conditions

Description of the laser and pumping conditions  
*Continuous-wave, pulsed, temperature of operation*

Yes  
 No

*Explain why this information is not reported/not relevant.*

Threshold values provided as density values (e.g. W cm<sup>-2</sup> or J cm<sup>-2</sup>) taking into account the area of the device

Yes  
 No

*Explain why this information is not reported/not relevant.*

##### 6. Alternative explanations

Reasoning as to why alternative explanations have been ruled out as responsible for the emission characteristics  
*e.g. amplified spontaneous, directional scattering; modification of fluorescence spectrum by the cavity*

Yes  
 No

*Explain why this information is not reported/not relevant.*

##### 7. Theoretical analysis

Theoretical analysis that ensures that the experimental values measured are realistic and reasonable  
*e.g. laser threshold, linewidth, cavity gain-loss, efficiency*

Yes  
 No

*Explain why this information is not reported/not relevant.*

##### 8. Statistics

Number of devices fabricated and tested

Yes  
 No

*Explain why this information is not reported/not relevant.*

Statistical analysis of the device performance and lifetime (time to failure)

Yes  
 No

*Explain why this information is not reported/not relevant.*
